# Supplementary material
Source: HighWire-hosted journal article supplement (https://cmaj.ca/highwire/filestream/58083/field_highwire_adjunct_files/2/screen-gilbody-3-atONLINEonly.pdf)
Supplement: screen-gilbody-3-atONLINEonly.pdf [file screen-gilbody-3-atONLINEonly.pdf]

### Appendix 3: Studies identified but excluded from our meta-analysis of screening and case-finding instruments for depression

#### Reason for exclusion, reference

##### Enhancement of care including the addition of a case manager

- Adler DA, Bungay KM, Wilson IB, et al. The impact of a pharmacist intervention on 6-month outcomes in depressed primary care patients. *Gen Hosp Psychiatry* 2004;26:199-209.
- Akerblad AC, Bengtsson F, Ekselius L, et al. Effects of an educational compliance enhancement programme and therapeutic drug monitoring on treatment adherence in depressed patients managed by general practitioners. *Int Clin Psychopharmacol* 2003;18:347-54.
- Araya R, Rojas G, Fritsch R, et al. Treating depression in primary care in low income women in Santiago, Chile: a randomised controlled trial. *Lancet* 2003;361:995-1000.
- Bosmans J, de Bruijne M, van Hout H, et al. Cost-effectiveness of a disease management program for major depression in elderly primary care patients. *J Gen Intern Med* 2006;21:1020-6.
- Blanchard MR, Waterreus A, Mann AH. The effect of primary care nurse intervention upon older people screened as depressed. *Int J Geriatr Psychiatry* 1995;10:289-98.
- Brook O, van Hout H, Nieuwenhuys H, et al. Impact of coaching by community pharmacists on drug attitude of depressive primary care patients and acceptability to patients; a randomized controlled trial. *Eur Neuropsychopharmacol* 2003;13:1-9.
- Bruce M, Ten Have T, Reynolds C, et al. Reducing suicidal ideation and depressive symptoms in depressed older primary care patients. *JAMA* 2004;291:1081-91.
- Callahan C, Hendrie H, Dittus R, et al. Improving treatment of late life depression in primary care: a randomized clinical trial. *J Am Geriatr Soc* 1994;42:839-46.
- Capoccia KL, Boudreau DM, Blough DK, et al. Randomized trial of pharmacist interventions to improve depression care and outcomes in primary care. *Am J Health Syst Pharm* 2004;61:364-72.
- Coleman EA, Grothaus LC, Sandhu N, et al. Chronic care clinics: a randomized controlled trial of a new model of primary care for frail older adults. *J Am Geriatr Soc* 1999;47:775-83.
- Datto CJ, Thompson R, Horowitz D, et al. The pilot study of a telephone disease management program for depression. *Gen Hosp Psychiatry* 2003;25:169-77.
- Dietrich AJ, Oxman TE, Williams JW, Jr, et al. Going to scale: re-engineering systems for primary care treatment of depression. *Ann Fam Med* 2004;2:301-4.
- Finley P, Rens H, Gess S, et al. Case management of depression by clinical pharmacists in a primary care setting. *Formulary* 1999;34:864-70.
- Hunkeler EM, Meresman JF, Hargreaves WA, et al. Efficacy of nurse telehealth care and peer support in augmenting treatment of depression in primary care. *Arch Fam Med* 2000;9:700-8.
- Jarjoura D, Polen A, Baum E, et al. Effectiveness of screening and treatment for depression in ambulatory indigent patients. *J Gen Intern Med* 2004;19:78-84.
- Katon W, Robinson P, Von Korff M, et al. A multifaceted intervention to improve treatment of depression in primary care. *Arch Gen Psychiatry* 1996;53:924-32.
- Katon W, Von Korff M, Lin E, Simon G, et al. Stepped collaborative care for primary care patients with persistent symptoms of depression: a randomized trial. *Arch Gen Psychiatry* 1999;56:1109-15.
- Katon W, Rutter C, Ludman EJ, et al. A randomized trial of relapse prevention of depression in primary care. *Arch Gen Psychiatry* 2001;58:241-7.
- Katon WJ, Von Korff M, Lin EHB, et al. The Pathways Study: A randomized trial of collaborative care in patients with diabetes and depression. *Arch Gen Psychiatry* 2004;61:1042-9.
- Katzelnick DJ, Simon GE, Pearson SD, et al. Randomized trial of a depression management program in high utilizers of medical care. *Arch Fam Med* 2000;9:345-51.
- Oslin D, Sayers S, Ross J, et al. Disease management for depression and at risk drinking via telephone in an older population of veterans. *Psychosom Med* 2003;65:931-7.
- Peveler R, George C, Kinmonth AL, et al. Effect of antidepressant drug counselling and information leaflets on adherence to drug treatment in primary care: randomised controlled trial. *BMJ* 1999;319:612-5.
- Rickles N, Svarstad BL, Statz-Paynter JL, et al. Pharmacist telemonitoring of antidepressant use: effects on pharmacist-patient collaboration. *J Am Pharm Assoc (2003)* 2005;45:344-53.
- Rost K, Nutting PA, Smith J, et al. Improving depression outcomes in community primary care practice: a randomised trial of the QuEST intervention. *J Gen Intern Medicine* 2001;16:143-9.
- Simon G, Von Korff M, Rutter C, et al. Randomised trial of monitoring, feedback and management of care by telephone to improve treatment of depression in primary care. *BMJ* 2000;320:550-4.
- Simon GE, Ludman EJ, Tutty S, et al. Telephone psychotherapy and telephone care management for primary care patients starting antidepressant treatment: a randomized controlled trial. *JAMA* 2004;292:935-42.
- Unutzer J, Katon W, Williams J, et al. Improving primary care for depression in late life: the design of a multicenter randomized trial. *Med Care* 2001;39:785-99.
- Wang PS, Simon GE, Avorn J, et al. Telephone screening, outreach, and care management for depressed workers and impact on clinical and work productivity outcomes: a randomized controlled trial. *JAMA* 2007;298:1401-141.
- Wells KA, Sherbourne C, Schoenbaum M, et al. Impact of disseminating quality improvement programmes for depression in managed primary care: a randomized controlled trial. *JAMA* 2000;283:212-20.
- Whooley MA, Stone B, Soghikian K. Randomized trial of case-finding for depression in elderly primary care patients. *J Gen Intern Med* 2000;15:293-300.
- Wilkinson G, Allen P, Marshall E. The role of the practice nurse in the management of depression in general practice: treatment adherence to antidepressant medication. *Psychol Med* 1993;23:229-37.

---

**Educational intervention with no feedback of screening instrument**

- Thompson C, Kinmonth AL, Stevens L, et al. Effects of clinical-practice guideline and practice-based education on detection and outcome of depression in primary care: Hampshire Depression project randomised controlled trial. *Lancet* 2000;355:185-91.

**Nonrandomized screening study**

- Gold I, Baraff LJ. Psychiatric screening in the emergency department: its effect on physician behaviour. *Ann Emerg Med* 1989;18:875-80.

**Generic HRQoL instrument**

- Moore AA, Siu AL, Partridge JM, et al. A randomised trial of office based screening for common problems in older persons. *Am J Med* 1997;102:371-8.
- Rubenstein LV, Calkins DR, Young RT. Improving patient functioning: a randomised trial of functional disability screening. *Ann Intern Med* 1989;111:836-42.
- Calkins DR, Rubenstein LV, Cleary PD. Functional disability screening of ambulatory patients: a randomised controlled trial in a hospital based group practice. *J Gen Intern Med* 1994;9:590-2.

**Not randomized**

- Reifler DR, Kessler HS, Bernhard EJ, et al. Impact of screening for mental health concerns on health service utilization and functional status in primary care patients. *Arch Intern Med* 1996;156:2593-9.

**Educational intervention with no feedback of screening instrument**

- Goldsmith G, Brodwick M. Assessing the functional status of older patients with chronic illness. *Fam Med* 1989;21:38-41.
  - Brown JB, Shye D, McFarland BH, et al. Controlled trials of CQI and academic detailing to implement a clinical practice guideline for depression. *Jt Comm J Qual Improv* 2000;26:39-54.
  - Goldberg HI, Wagner EH, Fihn SD, et al. A randomized controlled trial of CQI teams and academic detailing: Can they alter compliance with guidelines? *Jt Comm J Qual Improv* 1998;24:130-42.
  - Andersen SM, Harthorn BH. Changing the psychiatric knowledge of primary care physicians: the effects of a brief intervention on clinical diagnosis and treatment. *Gen Hosp Psychiatry* 1990;12:177-90.
  - Worrall G, Angel J, Chaulk P, et al. Effectiveness of an educational strategy to improve family physicians' detection and management of depression. *CMAJ* 1999;161:37-40.
  - Rollman BL, Hanusa BH, Gilbert T, et al. The electronic medical record. *Arch Intern Med* 2001;161:189-97.
-
